# Supplementary material for: PEDF decreases cardiomyocyte edema during oxygen-glucose deprivation and recovery via inhibiting lactate accumulation and expression of AQP1
Source: PubMed Central journal article supplement — Int J Mol Med. 2019 Mar 12;43(5):1979–90. doi: 10.3892/ijmm.2019.4132 (PMC6445592; doi:10.3892/ijmm.2019.4132), 2019-03-12

Figure S1. Expression of PEDF following ischemia and reperfusion, and the validity of PEDF transfection. Western blot analysis was used to determine PEDF content. A plasmid lentivirus was constructed and labeled with green fluorescent protein (original magnification, x200). (A) Transfection of PEDF in the lentivirus-injected myocardium. (B) Expression of PEDF following ischemia and reperfusion. Data are presented as the mean  $\pm$  standard error of the mean (n=3). \*P<0.01, vs. Sham group; #P<0.01, vs. I group;  $\Delta$ P<0.01, vs. I/R group. PEDF, pigment epithelium derived factor; I, ischemia; R, reperfusion.

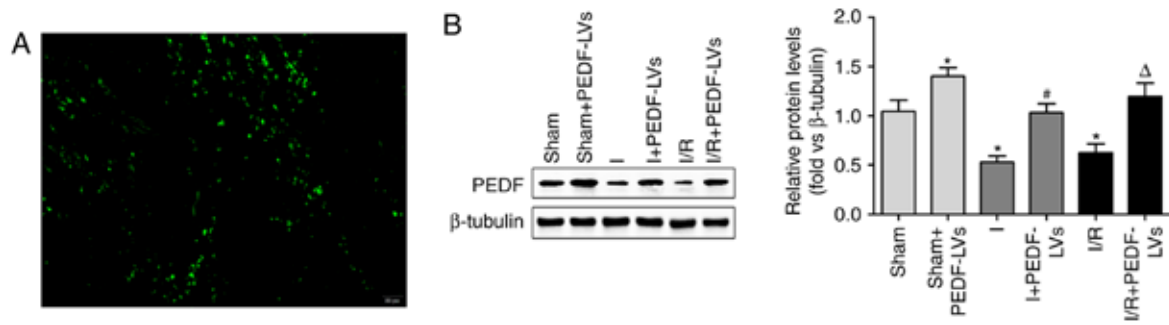

Supplement: IJMM-43-05-1979-supp.pdf [file IJMM-43-05-1979-supp.pdf]
